# Supplementary material for: A preliminary exploration of the impact of experiential learning on animal science undergraduates’ perceptions of humane stunning and slaughter
Source: PubMed Central journal article supplement — Transl Anim Sci. 2022 Aug 15;6(3):txac108. doi: 10.1093/tas/txac108 (PMC9423032; doi:10.1093/tas/txac108), 2022-08-15
Supplement: txac108_suppl_supplementary_material.pdf [file txac108_suppl_supplementary_material.pdf]

Name: \_\_\_\_\_

### Presurvey

Stunning is defined as: rendering an animal unconscious (insensible) prior to processing so that the animal does not feel pain or discomfort.

1. Stunning is a critical component of livestock slaughter.  
Strongly Disagree      Disagree      Agree      Strongly Agree      I do not know
2. Stunning is a humane process that ensures animal welfare during the slaughter process.  
Strongly Disagree      Disagree      Agree      Strongly Agree      I do not know
3. Human safety is an important part of training an individual to use stunning equipment.  
Strongly Disagree      Disagree      Agree      Strongly Agree      I do not know
4. Discussing livestock slaughter makes me feel uncomfortable.  
Strongly Disagree      Disagree      Agree      Strongly Agree      I do not know
5. Watching livestock slaughter makes me feel uncomfortable.  
Strongly Disagree      Disagree      Agree      Strongly Agree      I do not know
6. Slaughter is a painful process for animals.  
Strongly Disagree      Disagree      Agree      Strongly Agree      I do not know
7. I feel prepared to discuss the slaughter process.  
Strongly Disagree      Disagree      Agree      Strongly Agree      I do not know

### Demographics

1. What gender do you identify with?  
 Man  
 Woman  
 Non-binary  
 Other  
 Prefer not to answer
2. What race and ethnicity do you identify as?  
 White  
 Black or African American  
 American Indian or Alaska Native  
 Asian  
 Native Hawaiian or Other Pacific Islander  
 Hispanic or Latino (of any race)

- Other
- Prefer not to answer

3. What is your age (in years)? \_\_\_\_\_

4. Which region of the United States are you from?
- a. Midwest (IA,IL,IN,KS,MI,MN,MO,ND,NE,OH,SD,WI)
  - b. West (CA,CO,ID,MT,NV,OR,UT,WA,WY)
  - c. Southwest (AZ,NM,OK,TX)
  - d. Southeast (AL,AR,FL,GA,LA,KY,MS,NC,SC,TN,VA,WV)
  - e. Northeast (CT,DE,MA,ME,MD,NH,NJ,NY,PA,VT,RI)
  - f. Alaska or Hawaii
  - g. Not from the United States

5. Which best describes your hometown?

- Rural
- Suburban
- Urban
- Other

6. Indicate your level of exposure to livestock slaughter prior to this class:

- None
- Understood the process but had never watched it
- Previously witnessed the slaughter process
- Have performed stunning/slaughter

7. What year are you at CSU?

- Freshman
- Sophomore
- Junior
- Senior

Name: \_\_\_\_\_

### Post Survey

Stunning is defined as: rendering an animal unconscious (insensible) prior to processing so that the animal does not feel pain or discomfort.

1. Stunning is a critical component of livestock slaughter.  
Strongly Disagree      Disagree      Agree      Strongly Agree      I do not know
2. Stunning is a humane process that ensures animal welfare during the slaughter process.  
Strongly Disagree      Disagree      Agree      Strongly Agree      I do not know
3. Human safety is an important part of training an individual to use stunning equipment.  
Strongly Disagree      Disagree      Agree      Strongly Agree      I do not know
4. Discussing livestock slaughter makes me feel uncomfortable.  
Strongly Disagree      Disagree      Agree      Strongly Agree      I do not know
5. Watching livestock slaughter makes me feel uncomfortable.  
Strongly Disagree      Disagree      Agree      Strongly Agree      I do not know
6. Slaughter is a painful process for animals.  
Strongly Disagree      Disagree      Agree      Strongly Agree      I do not know
7. I feel prepared to discuss the slaughter process.  
Strongly Disagree      Disagree      Agree      Strongly Agree      I do not know
8. Did you try using the captive bolt gun to stun the model head during lab? Yes or no (circle one).
  - a. Why or why not?
  - b. If yes, using the captive bolt gun on the model head was beneficial to my learning about livestock slaughter.  
  
Strongly Disagree      Disagree      Agree      Strongly Agree      I do not know
9. Watching the demonstration with the model heads and captive bolt gun was beneficial to my learning about livestock slaughter.  
Strongly Disagree      Disagree      Agree      Strongly Agree      I do not know

10. Watching the demonstration with the split carcass head specimens was beneficial to my learning about livestock slaughter.
- |                   |          |       |                |               |
|-------------------|----------|-------|----------------|---------------|
| Strongly Disagree | Disagree | Agree | Strongly Agree | I do not know |
|-------------------|----------|-------|----------------|---------------|
11. Watching the demonstration with the model heads and the captive bolt gun improved my understanding of slaughter.
- |                   |          |       |                |               |
|-------------------|----------|-------|----------------|---------------|
| Strongly Disagree | Disagree | Agree | Strongly Agree | I do not know |
|-------------------|----------|-------|----------------|---------------|
12. Watching the demonstration with the split carcass head specimens improved my understanding of slaughter.
- |                   |          |       |                |               |
|-------------------|----------|-------|----------------|---------------|
| Strongly Disagree | Disagree | Agree | Strongly Agree | I do not know |
|-------------------|----------|-------|----------------|---------------|
13. Watching the demonstration with the model heads and the captive bolt gun made me more comfortable with the slaughter process.
- |                   |          |       |                |               |
|-------------------|----------|-------|----------------|---------------|
| Strongly Disagree | Disagree | Agree | Strongly Agree | I do not know |
|-------------------|----------|-------|----------------|---------------|
14. Watching the demonstration with the split carcass head specimens made me more comfortable with the slaughter process.
- |                   |          |       |                |               |
|-------------------|----------|-------|----------------|---------------|
| Strongly Disagree | Disagree | Agree | Strongly Agree | I do not know |
|-------------------|----------|-------|----------------|---------------|
15. I would like to see hands-on activities similar to this integrated into other Animal Science courses.
- |                   |          |       |                |               |
|-------------------|----------|-------|----------------|---------------|
| Strongly Disagree | Disagree | Agree | Strongly Agree | I do not know |
|-------------------|----------|-------|----------------|---------------|
16. What were the most valuable aspects about watching the demonstration with the model heads and the split carcass heads?
17. What were the least valuable aspects about watching the demonstration with the model heads and the split carcass heads?
